# Supplementary material for: Neural computations underlying inverse reinforcement learning in the human brain
Source: PubMed Central journal article supplement (PMC5662289; doi:10.7554/elife.29718), 2017-10-30
Supplement: elife-29718-transrepform.pdf [file elife-29718-transrepform.pdf]

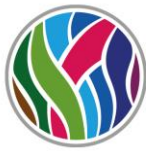

## **eLife's transparent reporting form**

We encourage authors to provide detailed information *within their submission* to facilitate the interpretation and replication of experiments. If you have any questions, please contact us: [editorial@elifesciences.org](mailto:editorial@elifesciences.org).

### **Sample-size estimation**

- You should state whether an appropriate sample size was computed when the study was being designed
- You should state the statistical method of sample size computation and any required assumptions
- If no explicit power analysis was used, you should describe how you decided what sample (replicate) size (number) to use

Please outline where this information can be found within the submission (e.g., page numbers or figure legends), or explain why this information doesn't apply to your submission:

Our sample size (43 participants) was chosen according to two factors: First, fMRI studies typically include close to 25 participants, which can be seen as a general minimum. Second, we calculated the number of subjects needed for > 80% power using pilot data and the Neupower tool (<http://neupowertools.org/neupower/neupowerstart/>). For uncorrected whole brain results, we would need 30 participants, and under random field theory we would need 40. Hence we chose to recruit slightly over 40 participants.

### **Replicates**

- You should report how often each experiment was performed
- You should include a definition of biological versus technical replication
- The data obtained should be provided and sufficient information should be provided to indicate the number of independent biological and/or technical replicates
- If you encountered any outliers, you should describe how these were handled
- Criteria for exclusion/inclusion of data should be clearly stated
- High-throughput sequence data should be uploaded before submission, with a private link for reviewers provided (these are available from both GEO and ArrayExpress)

Please outline where this information can be found within the submission (e.g., page numbers or figure legends), or explain why this information doesn't apply to your submission:

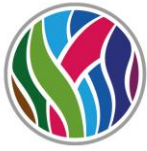

fMRI experiments are typically only performed once on a specific task, hence this information does not apply to this submission.

### Statistical reporting

- Statistical analysis methods should be described and justified
- Raw data should be presented in figures whenever informative to do so (typically when N per group is less than 10)
- For each experiment, you should identify the statistical tests used, exact values of N, definitions of center, methods of multiple test correction, and dispersion and precision measures (e.g., mean, median, SD, SEM, confidence intervals; and, for the major substantive results, a measure of effect size (e.g., Pearson's  $r$ , Cohen's  $d$ ))
- Report exact p-values wherever possible alongside the summary statistics and 95% confidence intervals. These should be reported for all key questions and not only when the p-value is less than 0.05.

Please outline where this information can be found within the submission (e.g., page numbers or figure legends), or explain why this information doesn't apply to your submission:

Statistical analysis methods are described throughout the Result section, and more details can be found in the Materials & Methods section.

(For large datasets, or papers with a very large number of statistical tests, you may upload a single table file with tests, Ns, etc., with reference to page numbers in the manuscript.)

### Additional data files ("source data")

- We encourage you to upload relevant additional data files, such as numerical data that are represented as a graph in a figure, or as a summary table
- Where provided, these should be in the most useful format, and they can be uploaded as "Source data" files linked to a main figure or table
- Include model definition files including the full list of parameters used
- Include code used for data analysis (e.g., R, MatLab)
- Avoid stating that data files are "available upon request"

Please indicate the figures or tables for which source data files have been provided:

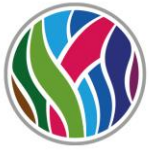

Summary tables of imaging results can be found in the Supplementary Figure 3.2. and 4.2.. Formal model definitions can be found in the Materials and Method Section and the scripts will be uploaded to the first author's github repository (<https://github.com/isaksson82/invRL2017>).

Activation maps can be found at Neurovault (indexed at biosharing.org): <http://neurovault.org/collections/ZZHNHAJU/>. Full single subject raw data will be made public on the NIH NDAR repository, as per NIH rules (procedure is ongoing).
